# Supplementary material for: Gold nanoparticle-based immunochromatographic assay for rapid detection of imazalil
Source: Royal Society of Chemistry journal article supplement (doi:10.1039/d3nh00371j), 2023-10-06
Supplement: d3nh00371j1.pdf [file d3nh00371j1.pdf]

*Supplementary Information*

**Gold nanoparticle-based immunochromatographic assay for  
rapid detection of imazalil**

Xinxin Xu<sup>a,b</sup>, Aihong Wu<sup>a,b</sup>, Lingling Guo<sup>a,b</sup>, Hua Kuang<sup>a,b</sup>, Liguang Xu<sup>a,b</sup>, Chuanlai Xu<sup>a,b\*</sup>,  
Liqiang Liu<sup>a,b\*</sup>

<sup>a</sup> *International Joint Research Laboratory for Biointerface and Biodetection, and School of Food Science and Technology, Jiangnan University, Wuxi, Jiangsu 214122, P. R. China;* <sup>b</sup> *State Key Laboratory of Food Science and Technology, Jiangnan University, Wuxi, Jiangsu 214122, P. R. China.*

\*Corresponding author. E-mail: [murel@163.com](mailto:murel@163.com); [xcl@jiangnan.edu.cn](mailto:xcl@jiangnan.edu.cn);

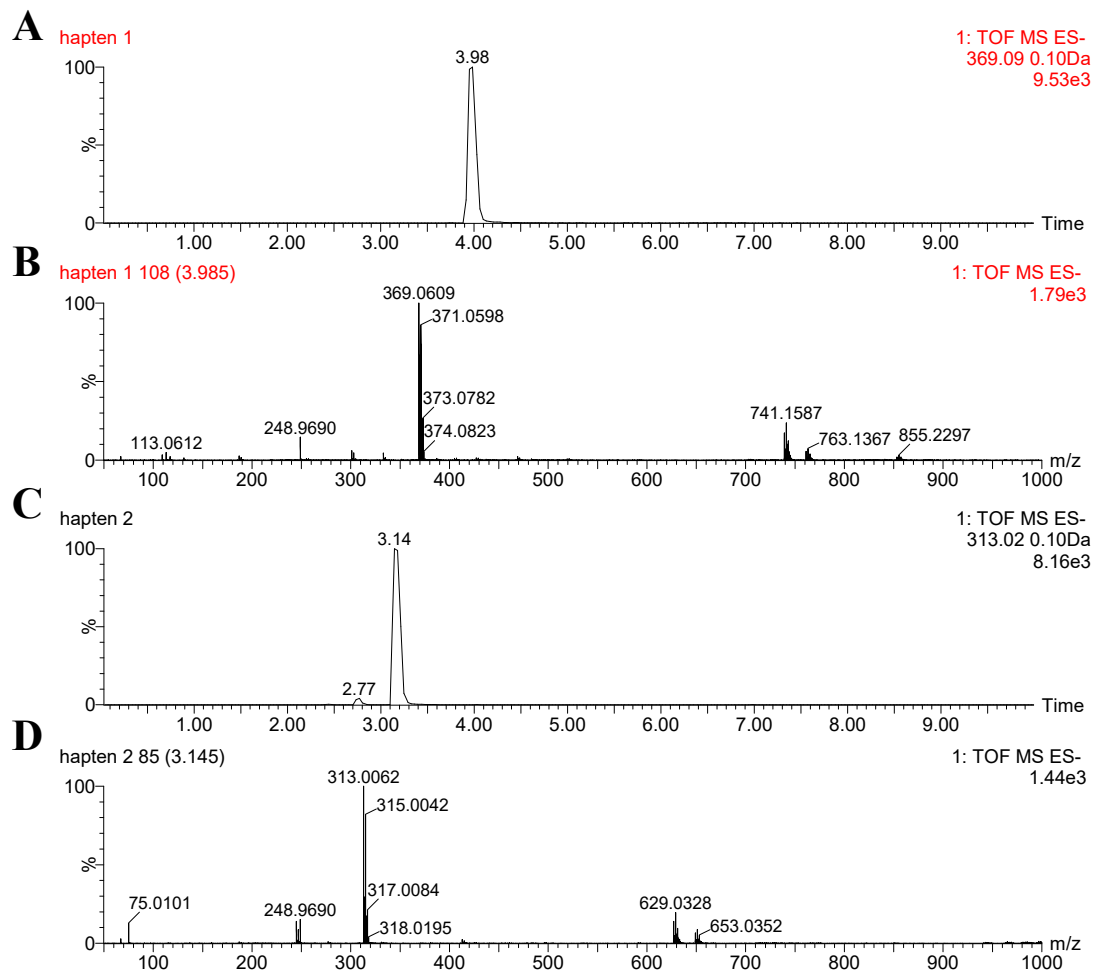

**Figure S1.** LC-MS analysis of IMZ haptens. (A) The liquid chromatogram of hapten 1. (B) The mass spectrum of hapten 1. (C) The liquid chromatogram of hapten 2. (D) The mass spectrum of hapten 2.

**A**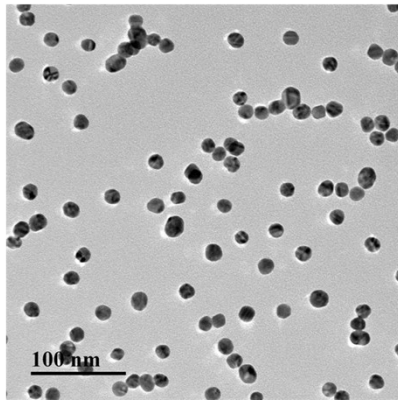**B**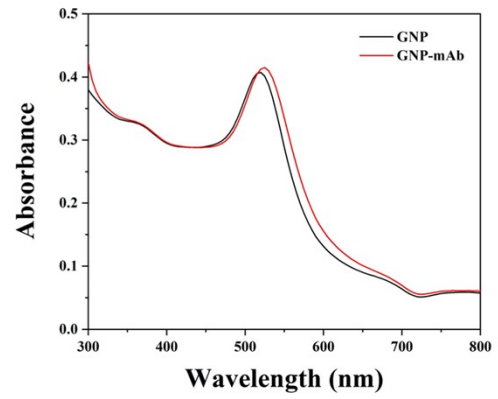

**Figure S2.** Characterization of GNPs. (A) Transmission electron microscopy of GNPs. (B) UV spectroscopy of GNPs and GNP-mAbs.

| Immunogen                       |                    |                | BSA-hapten 1             |       |       |       |       | BSA-hapten 2             |       |       |       |       |
|---------------------------------|--------------------|----------------|--------------------------|-------|-------|-------|-------|--------------------------|-------|-------|-------|-------|
| Coating antigen                 |                    |                | OVA-hapten 1 (0.1 µg/mL) |       |       |       |       | OVA-hapten 2 (0.1 µg/mL) |       |       |       |       |
| Mice number                     |                    |                | 1                        | 2     | 3     | 4     | 5     | 6                        | 7     | 8     | 9     | 10    |
| 3 <sup>rd</sup><br>immunization | Titer              | OD450          | 2.092                    | 1.564 | 2.025 | 1.613 | 1.729 | 1.648                    | 2.291 | 2.07  | 1.978 | 1.317 |
|                                 | Inhibitory effects | IMZ<br>200 ppb | <0                       | 19%   | 4%    | 13%   | 2%    | 76%                      | 76%   | 70%   | 7%    | 51%   |
| 5 <sup>th</sup><br>immunization | Titer              | OD450          | Not measured             |       |       |       |       | 1.165                    | 2.333 | 1.367 | 1.539 | 1.162 |
|                                 | Inhibitory effects | IMZ<br>20 ppb  | Not measured             |       |       |       |       | 59%                      | 55%   | 62%   | 9%    | 37%   |

**Table S1.** Antisera data of mice immunized with BSA-hapten 1 and BSA-hapten 2.
